# Supplementary material for: Association of Prenatal Exposure to Valproate and Other Antiepileptic Drugs With Risk for Attention-Deficit/Hyperactivity Disorder in Offspring
Source: PubMed Central journal article supplement (PMC6324310; doi:10.1001/jamanetworkopen.2018.6606), 2019-01-04
Supplement: jamanetwopen-2-e186606-s001.pdf [file jamanetwopen-2-e186606-s001.pdf]

## Supplementary Online Content

Christensen J, Pedersen LH, Sun Y, Dreier JW, Brikell I, Dalgaard S. Association of prenatal exposure to valproate and other antiepileptic drugs with risk for attention-deficit/hyperactivity disorder in offspring. *JAMA Netw Open*. 2019;2(1):e186606. doi:10.1001/jamanetworkopen.2018.6606

**eTable 1.** Hazard Ratio of Attention Deficit Hyperactivity Disorder (ADHD) in the Offspring of Women Who Used Antiepileptic Drugs in Monotherapy Compared With the Risk in the Offspring of Women Who Used Lamotrigine in Monotherapy During Pregnancy

**eTable 2.** Hazard Ratio of Attention Deficit Hyperactivity Disorder (ADHD) in the Offspring of Women Who Used Valproate During Pregnancy Compared With the Risk in Offspring of Women Who Used Valproate Prior to Pregnancy

**eTable 3.** Hazard Ratio of Attention Deficit Hyperactivity Disorder (ADHD) in the Offspring of Women Who Used Valproate During Pregnancy Stratified on Time of Exposure During Pregnancy

**eTable 4.** Hazard Ratio of Attention Deficit Hyperactivity Disorder (ADHD) in the Offspring of Women Who Used Antiepileptic Drugs (AEDs) in Poly- and Monotherapy During Pregnancy Compared With the Offspring of Women Who Did Not Use Antiepileptic Drugs During Pregnancy

**eTable 5.** Hazard Ratio of Attention Deficit Hyperactivity Disorder (ADHD) in the Offspring of Women Who Used Antiepileptic Drugs (AEDs) in Monotherapy at High and Low Dose During Pregnancy Compared With the Offspring of Women Who Did Not Use AEDs During Pregnancy

**eTable 6.** Hazard Ratio of Attention Deficit Hyperactivity Disorder (ADHD) in the Offspring of Women Who Used Valproate During Pregnancy After Adjusting Also for Maternal Smoking

**eTable 7.** Hazard Ratio of Attention Deficit Hyperactivity Disorder (ADHD) in Offspring of Women Who Used Valproate During Pregnancy After Excluding 39,080 Children With Congenital Malformations

**eTable 8.** Hazard Ratio of Attention Deficit Hyperactivity Disorder (ADHD) in Offspring of Women Who Used Valproate During Pregnancy After Excluding 9,767 Children With Epilepsy

**eTable 9.** Hazard Ratio of Attention Deficit Hyperactivity Disorder (ADHD) in the Offspring of Women Who Used Antiepileptic Drugs in Monotherapy During Pregnancy Compared With the Risk in Offspring of Women Who Did Not Use Antiepileptic Drugs in Pregnancy After Excluding 9,767 Children With Epilepsy

**eTable 10.** Hazard Ratio of Attention Deficit Hyperactivity Disorder (ADHD) in the Offspring of Women Who Used Valproate During Pregnancy After Excluding 1,340 Women With ADHD From the Analyses

**eTable 11.** Hazard Ratio of Attention Deficit Hyperactivity Disorder (ADHD) in the Offspring of Women Who Used Valproate During Pregnancy After Increasing the Exposure Period From 30 Days to 90 Before Conception

**eTable 12.** Hazard Ratio of Attention Deficit Hyperactivity Disorder (ADHD) With Follow Up at 3 Years of Age in the Offspring of Women Who Used Antiepileptic Drugs in

Monotherapy During Pregnancy Compared With the Risk in Offspring of Women Who Did Not Use Antiepileptic Drugs in Pregnancy

This supplementary material has been provided by the authors to give readers additional information about their work.

**eTable 1.** Hazard ratio of attention deficit hyperactivity disorder (ADHD) in the offspring of women who used antiepileptic drugs in monotherapy compared with the risk in the offspring of women who used lamotrigine in monotherapy during pregnancy

| Monotherapy exposure to antiepileptic drugs | Live births (Number) | Person-years at risk | ADHD (Number) | Incidence (Cases per 1,000 person-years (95% CI)) | Hazard ratio, crude (95% CI) |             | Hazard ratio, adjusted* (95% CI) |             |
|---------------------------------------------|----------------------|----------------------|---------------|---------------------------------------------------|------------------------------|-------------|----------------------------------|-------------|
|                                             |                      |                      |               |                                                   |                              |             |                                  |             |
| Exposed to valproate                        | 431                  | 5,307                | 38            | 7.2 (5.2-9.8)                                     | 1.85                         | (1.21-2.84) | 2.16                             | (1.34-3.48) |
| Exposed to carbamazepine                    | 423                  | 5,556                | 31            | 5.6 (3.9-7.9)                                     | 1.47                         | (0.92-2.33) | 1.79                             | (1.06-3.04) |
| Exposed to clonazepam                       | 314                  | 3,657                | 25            | 6.8 (4.6-10.1)                                    | 1.76                         | (1.09-2.86) | 1.96                             | (1.09-3.50) |
| Exposed to oxcarbazepine                    | 372                  | 4,577                | 25            | 5.5 (3.7-8.1)                                     | 1.40                         | (0.87-2.27) | 1.58                             | (0.91-2.58) |
| Exposed to lamotrigine                      | 1,383                | 12,140               | 41            | 3.4 (2.5-4.6)                                     | 1.0                          | (ref)       | 1.0                              | (ref)       |

\*Adjusted for maternal age at conception, maternal psychiatric history, maternal epilepsy, maternal diabetes, sex of the child, year of birth and parity.

**eTable 2.** Hazard ratio of attention deficit hyperactivity disorder (ADHD) in the offspring of women who used valproate during pregnancy compared with the risk in offspring of women who used valproate prior to pregnancy

| Valproate exposure | Live births (Number) | Person-years at risk | ADHD (number) | Hazard ratio, crude (95% CI) |             | Hazard ratio, adjusted* (95% CI) |             |
|--------------------|----------------------|----------------------|---------------|------------------------------|-------------|----------------------------------|-------------|
| During pregnancy   | 580                  | 5,969                | 49            | 1.51                         | (1.00-2.28) | 1.66                             | (1.05-2.62) |
| Prior to pregnancy | 719                  | 8,960                | 41            |                              | Ref         | 1.00                             | Ref         |

\*Adjusted for maternal age at conception, maternal psychiatric history, maternal epilepsy, maternal diabetes, sex of the child, year of birth, and parity.

**eTable 3.** Hazard ratio of attention deficit hyperactivity disorder (ADHD) in the offspring of women who used valproate during pregnancy stratified on time of exposure during pregnancy

| Valproate exposure    | Time of exposure           | Live births<br>(number) | Persons-years at<br>risk | ADHD<br>(number) | Hazard ratio,<br>crude<br>(95% CI) |             | Hazard ratio,<br>adjusted*<br>(95% CI) |             |
|-----------------------|----------------------------|-------------------------|--------------------------|------------------|------------------------------------|-------------|----------------------------------------|-------------|
|                       |                            |                         |                          |                  |                                    |             |                                        |             |
| Valproate exposure    | First trimester            | 499                     | 6,120                    | 43               | 2.31                               | (1.71-3.11) | 1.52                                   | (1.10-2.10) |
|                       | After first trimester only | 81                      | 946                      | 6                | 2.12                               | (0.93-4.80) | 1.22                                   | (0.52-2.86) |
| No valproate exposure | Not exposed to valproate   | 912,722                 | 10,212,263               | 29,396           | 1.00                               | (ref)       | 1.0                                    | (ref)       |

\*Adjusted for maternal age at conception, maternal psychiatric history, maternal epilepsy, maternal diabetes, sex of the child, year of birth, and parity.

**eTable 4.** Hazard ratio of attention deficit hyperactivity disorder (ADHD) in the offspring of women who used antiepileptic drugs (AEDs) in poly- and monotherapy during pregnancy compared with the offspring of women who did not use antiepileptic drugs during pregnancy

| AED           | AED exposure        | Live births (Number) | Person-years at risk | ADHD (Number) | Hazard ratio, crude (95% CI) |             | Hazard ratio, adjusted* (95% CI) |             |
|---------------|---------------------|----------------------|----------------------|---------------|------------------------------|-------------|----------------------------------|-------------|
| Valproate     | Monotherapy         | 431                  | 5,307                | 38            | 2.37                         | (1.73-3.26) | 1.52                             | (1.05-2.19) |
|               | Polytherapy         | 149                  | 1,1759               | 11            | 2.11                         | (1.17-3.83) | 1.43                             | (0.75-2.70) |
|               | No exposure to AEDs | 899,941              | 10,086,866           | 28,752        | 1.0                          | (ref)       | 1.0                              | (ref)       |
| Carbamazepine | Monotherapy         | 423                  | 5,556                | 31            | 1.78                         | (1.25-2.54) | 1.23                             | (0.84-1.82) |
|               | Polytherapy         | 81                   | 1,060                | 8             | 2.44                         | (1.21-4.92) | 1.63                             | (0.78-3.41) |
|               | No exposure to AEDs | 899,941              | 10,086,866           | 28,752        | 1.0                          | (ref)       | 1.0                              | (ref)       |
| Clonazepam    | Monotherapy         | 314                  | 3,657                | 25            | 2.35                         | (1.59-3.47) | 1.43                             | (0.95-2.16) |
|               | Polytherapy         | 130                  | 1,464                | 11            | 2.64                         | (1.52-5.06) | 1.70                             | (0.87-3.32) |
|               | No exposure to AEDs | 899,941              | 10,086,866           | 28,752        | 1.0                          | (ref)       | 1.0                              | (ref)       |
| Lamotrigine   | Monotherapy         | 1,383                | 12,140               | 41            | 1.45                         | (1.07-1.98) | 0.84                             | (0.59-1.19) |
|               | Polytherapy         | 363                  | 3,711                | 24            | 2.43                         | (1.62-3.63) | 1.39                             | (0.87-2.21) |
|               | No exposure to AEDs | 899,941              | 10,086,866           | 28,752        | 1.0                          | (ref)       | 1.0                              | (ref)       |
| Oxcarbazepine | Monotherapy         | 372                  | 4,577                | 25            | 1.81                         | (1.22-2.68) | 1.10                             | (0.72-1.67) |
|               | Polytherapy         | 120                  | 1,401                | 9             | 2.17                         | (1.13-4.20) | 1.37                             | (0.69-2.75) |
|               | No exposure to AEDs | 899,941              | 10,086,866           | 28,752        | 1.0                          | (ref)       | 1.0                              | (ref)       |

\*Adjusted for maternal age at conception, maternal psychiatric history, maternal epilepsy, maternal diabetes, sex of the child, year of birth, and parity.

**eTable 5.** Hazard ratio of attention deficit hyperactivity disorder (ADHD) in the offspring of women who used antiepileptic drugs (AEDs) in monotherapy at high and low dose during pregnancy compared with the offspring of women who did not use AEDs during pregnancy.

| AED           | AED exposure                | Live births (Number) | Persons-years | ADHD(Number) | Hazard ratio, crude (95% CI) |             | Hazard ratio, adjusted* (95% CI) |             |
|---------------|-----------------------------|----------------------|---------------|--------------|------------------------------|-------------|----------------------------------|-------------|
| Valproate     | High dose (>750 mg)         | 204                  | 2,571         | 20           | 2.57                         | (1.66-3.96) | 1.68                             | (1.04-2.71) |
|               | Low dose ( $\leq$ 750 mg)   | 227                  | 2,735         | 18           | 2.19                         | (1.37-3.49) | 1.37                             | (0.82-2.27) |
|               | No exposure                 | 899,941              | 10,086,866    | 28,752       | 1.0                          | (ref)       | 1.0                              | (ref)       |
| Carbamazepine | High dose (>500 mg)         | 245                  | 3,284         | 15           | 1.45                         | (0.87-2.40) | 0.99                             | (0.58-1.71) |
|               | Low dose ( $\leq$ 500 mg)   | 178                  | 2,272         | 16           | 2.29                         | (1.40-3.75) | 1.55                             | (0.92-2.60) |
|               | No exposure                 | 899,941              | 10,086,866    | 28,752       | 1.0                          | (ref)       | 1.0                              | (ref)       |
| Clonazepam    | High dose (>4 mg)           | 26                   | 365           | <5           | 3.43                         | (1.33-8.85) | 1.97                             | (0.76-5.14) |
|               | Low dose ( $\leq$ 4 mg)     | 288                  | 3,292         | 21           | 2.21                         | (1.44-3.39) | 1.37                             | (0.87-2.14) |
|               | No exposure                 | 899,941              | 10,086,866    | 28,752       | 1.0                          | (ref)       | 1.0                              | (ref)       |
| Lamotrigine   | High dose (>150 mg)         | 895                  | 7,918         | 21           | 1.13                         | (0.74-1.74) | 0.68                             | (0.43-1.07) |
|               | Low dose ( $\leq$ 150 mg)   | 488                  | 4,222         | 20           | 2.08                         | (1.34-3.25) | 1.08                             | (0.68-1.72) |
|               | No exposure                 | 899,941              | 10,086,866    | 28,752       | 1.0                          | (ref)       | 1.0                              | (ref)       |
| Oxcarbazepine | High dose (>1,000 mg)       | 201                  | 2,417         | 14           | 1.95                         | (1.15-3.31) | 1.30                             | (0.75-2.28) |
|               | Low dose ( $\leq$ 1,000 mg) | 171                  | 2,160         | 11           | 1.67                         | (0.93-3.00) | 0.94                             | (0.52-1.70) |
|               | No exposure                 | 899,941              | 10,086,866    | 28,752       | 1.0                          | (ref)       | 1.0                              | (ref)       |

\*Adjusted for maternal age at conception, maternal psychiatric history, maternal epilepsy, maternal diabetes, sex of the child, year of birth, and parity.

**eTable 6.** Hazard ratio of attention deficit hyperactivity disorder (ADHD) in the offspring of women who used valproate during pregnancy after adjusting also for maternal smoking

| Valproate exposure       | Live births<br>(Number) | Person-years<br>at risk | ADHD<br>(Number) | Incidence<br>(per 1000<br>person-years)<br>(95% CI) | Hazard ratio,<br>crude<br>(95% CI) |             | Hazard ratio,<br>adjusted*<br>(95% CI) |             |
|--------------------------|-------------------------|-------------------------|------------------|-----------------------------------------------------|------------------------------------|-------------|----------------------------------------|-------------|
| Exposed to valproate     | 580                     | 7,066                   | 49               | 6.9 (5.2-9.2)                                       | 2.28                               | (1.72-3.02) | 1.55                                   | (1.10-2.19) |
| Not exposed to valproate | 912,722                 | 10,212,263              | 29,396           | 2.9 (2.8-2.9)                                       | 1.0                                | (ref)       | 1.0                                    | (ref)       |

\*Adjusted for maternal age at conception, maternal psychiatric history, maternal epilepsy, maternal diabetes, smoking, sex of the child, year of birth, and parity.

**eTable 7.** Hazard ratio of attention deficit hyperactivity disorder (ADHD) in offspring of women who used valproate during pregnancy after excluding 39,080 children with congenital malformations

| (ADHD diagnosis in the offspring based on use of ADHD medicine and ICD 10 diagnosis) |                         |                         |                  |                                    |             |                                        |             |  |
|--------------------------------------------------------------------------------------|-------------------------|-------------------------|------------------|------------------------------------|-------------|----------------------------------------|-------------|--|
| Valproate exposure                                                                   | Live births<br>(Number) | Person-years<br>at risk | ADHD<br>(Number) | Hazard ratio,<br>crude<br>(95% CI) |             | Hazard ratio,<br>adjusted*<br>(95% CI) |             |  |
| Exposed to valproate                                                                 | 512                     | 6,279                   | 42               | 2.24                               | (1.65-3.03) | 1.47                                   | (1.06-2.05) |  |
| Not exposed to valproate                                                             | 873,710                 | 9,813,485               | 27,707           | 1.0                                | (ref)       | 1.0                                    | (ref)       |  |

\*Adjusted for maternal age at conception, maternal psychiatric history, maternal epilepsy, maternal diabetes, sex of the child, year of birth and parity.



**eTable 8.** Hazard ratio of attention deficit hyperactivity disorder (ADHD) in offspring of women who used valproate during pregnancy after excluding 9,767 children with epilepsy

| (ADHD diagnosis in the offspring based on use of ADHD medicine and ICD 10 diagnosis) |                      |                      |               |                              |             |                                  |             |
|--------------------------------------------------------------------------------------|----------------------|----------------------|---------------|------------------------------|-------------|----------------------------------|-------------|
| Valproate exposure                                                                   | Live births (Number) | Person-years at risk | ADHD (Number) | Hazard ratio, crude (95% CI) |             | Hazard ratio, adjusted* (95% CI) |             |
| Exposed to valproate                                                                 | 519                  | 6,200                | 40            | 2.20                         | (1.61-2.99) | 1.53                             | (1.05-2.23) |
| Not exposed to valproate                                                             | 903,016              | 10,095,537           | 28,297        | 1.0                          | (ref)       | 1.0                              | (ref)       |

\*Adjusted for maternal age at conception, maternal psychiatric history, maternal epilepsy, maternal diabetes, sex of the child, year of birth and parity.

**Table 9.** Hazard ratio of attention deficit hyperactivity disorder (ADHD) in the offspring of women who used antiepileptic drugs in monotherapy during pregnancy compared with the risk in offspring of women who did not use antiepileptic drugs in pregnancy after excluding 9,767 children with epilepsy

| Monotherapy exposure to antiepileptic drugs | Live births (Number) | Person-years at risk | ADHD (Number) | Incidence (Cases per 1,000 persons year) (95% CI) | Hazard ratio, crude (95% CI) |             | Hazard ratio, adjusted* (95% CI) |             |
|---------------------------------------------|----------------------|----------------------|---------------|---------------------------------------------------|------------------------------|-------------|----------------------------------|-------------|
| Exposed to valproate                        | 388                  | 4,685                | 33            | 0.70 (0.50-0.99)                                  | 2.42                         | (1.72-3.39) | 1.86                             | (1.21-2.85) |
| Exposed to carbamazepine                    | 406                  | 5,337                | 26            | 0.49 (0.33-0.72)                                  | 1.60                         | (1.09-2.36) | 1.32                             | (0.83-2.10) |
| Exposed to clonazepam                       | 307                  | 3,573                | 23            | 0.64 (0.43-0.97)                                  | 2.27                         | (1.51-3.40) | 1.36                             | (0.87-2.12) |
| Exposed to oxcarbazepine                    | 355                  | 4,347                | 20            | 0.46 (0.30-0.71)                                  | 1.57                         | (1.02-2.44) | 1.08                             | (0.64-1.82) |
| Exposed to lamotrigine                      | 1,353                | 11,814               | 39            | 0.33 (0.24-0.45)                                  | 1.47                         | (1.07-2.02) | 0.92                             | (0.64-1.33) |
| Not exposed to antiepileptic drugs          | 890,532              | 9,973,474            | 27,702        | 0.28 (0.27-0.28)                                  | 1.0                          | (ref)       | 1.0                              | (ref)       |

\*Adjusted for maternal age at conception, maternal psychiatric history, maternal diabetes, sex of the child, year of birth, and parity.

**eTable 10.** Hazard ratio of attention deficit hyperactivity disorder (ADHD) in the offspring of women who used valproate during pregnancy after excluding 1,340 women with ADHD from the analyses

| ADHD diagnosis based on medicine and ICD-10 diagnosis |                      |                      |               |                                             |                              |             |                                  |             |
|-------------------------------------------------------|----------------------|----------------------|---------------|---------------------------------------------|------------------------------|-------------|----------------------------------|-------------|
| Valproate exposure                                    | Live births (Number) | Person-years at risk | ADHD (Number) | Incidence (per 1,000 person-years) (95% CI) | Hazard ratio, crude (95% CI) |             | Hazard ratio, adjusted* (95% CI) |             |
| Exposed to valproate                                  | 580                  | 7,066                | 49            | 0.69 (0.52-0.92)                            | 2.29                         | (1.73-3.03) | 1.56                             | (1.10-2.21) |
| Not exposed to valproate                              | 911,382              | 10,202,874           | 29,320        | 0.29 (0.28-0.29)                            | 1.0                          | (ref)       | 1.0                              | (ref)       |

\*Adjusted for maternal age at conception, maternal psychiatric history, maternal epilepsy, maternal diabetes, sex of the child, year of birth, and parity.

**eTable 11.** Hazard ratio of attention deficit hyperactivity disorder (ADHD) in the offspring of women who used valproate during pregnancy after increasing the exposure period from 30 days to 90 before conception

| ADHD diagnosis based on medicine and ICD-10 diagnosis |                      |                      |               |                                             |                              |             |                                  |             |
|-------------------------------------------------------|----------------------|----------------------|---------------|---------------------------------------------|------------------------------|-------------|----------------------------------|-------------|
| Valproate exposure                                    | Live births (Number) | Person-years at risk | ADHD (Number) | Incidence (per 1,000 person-years) (95% CI) | Hazard ratio, crude (95% CI) |             | Hazard ratio, adjusted* (95% CI) |             |
| Exposed to valproate                                  | 637                  | 7,735                | 51            | 0.66 (0.50-0.87)                            | 2.17                         | (1.65-2.86) | 1.48                             | (1.05-2.07) |
| Not exposed to valproate                              | 912,665              | 10,211,595           | 29,394        | 0.29 (0.28-0.29)                            | 1.0                          | (ref)       | 1.0                              | (ref)       |

\*Adjusted for maternal age at conception, maternal psychiatric history, maternal epilepsy, maternal diabetes, sex of the child, year of birth, and parity.

**Table 12.** Hazard ratio of attention deficit hyperactivity disorder (ADHD) with follow up at 3 years of age in the offspring of women who used antiepileptic drugs in monotherapy during pregnancy compared with the risk in offspring of women who did not use antiepileptic drugs in pregnancy

| Monotherapy exposure to antiepileptic drugs | Live births (Number) | Person-years at risk | ADHD (Number) | Incidence (Cases per 1,000 persons year) (95% CI) | Hazard ratio, crude (95% CI) |             | Hazard ratio, adjusted* (95% CI) |             | Mean age at end of follow up (years) |
|---------------------------------------------|----------------------|----------------------|---------------|---------------------------------------------------|------------------------------|-------------|----------------------------------|-------------|--------------------------------------|
| Exposed to valproate                        | 419                  | 3.615                | 38            | 1.05 (0.76-1.44)                                  | 2.44                         | (1.78-3.36) | 1.93                             | (1.28-2.91) | 12.1                                 |
| Exposed to carbamazepine                    | 413                  | 3.889                | 28            | 0.72 (0.50-1.04)                                  | 1.67                         | (1.15-2.41) | 1.34                             | (0.86-2.10) | 12.9                                 |
| Exposed to clonazepam                       | 306                  | 2.419                | 23            | 0.95 (0.63-1.43)                                  | 2.22                         | (1.48-3.34) | 1.27                             | (0.80-2.00) | 11.4                                 |
| Exposed to oxcarbazepine                    | 367                  | 3.102                | 25            | 0.81 (0.54-1.19)                                  | 1.86                         | (1.26-2.76) | 1.17                             | (0.72-1.91) | 11.9                                 |
| Exposed to lamotrigine                      | 1.355                | 6.681                | 37            | 0.55 (0.40-0.76)                                  | 1.38                         | (1.00-1.91) | 0.84                             | (0.58-1.22) | 8.4                                  |
| Not exposed to antiepileptic drugs          | 883.311              | 6,527,235            | 27.832        | 0.43(0.42-0.43)                                   | 1.0                          | (ref)       | 1.0                              | (ref)       | 10.9                                 |

\*Adjusted for maternal age at conception, maternal psychiatric history, maternal diabetes, sex of the child, year of birth, and parity.
